# Supplementary material for: Targeting CK2 eliminates senescent cells and prolongs lifespan in Zmpste24-deficient mice
Source: PubMed Central journal article supplement (PMC11139886; doi:10.1038/s41419-024-06760-0), 2024-05-30
Supplement: 41419_2024_6760_MOESM1_ESM.pdf [file 41419_2024_6760_MOESM1_ESM.pdf]

A

|   | 1     | 2                       | 3                                 | 4               | 5                           | 6                         | 7                               | 8                       | 9                              | 10                 | 11                           | 12    |
|---|-------|-------------------------|-----------------------------------|-----------------|-----------------------------|---------------------------|---------------------------------|-------------------------|--------------------------------|--------------------|------------------------------|-------|
| a | Empty | 321674-73.1             | 476-66.4                          | 63585-09.1      | 93107-08-5                  | 95058-81.4                | 522-51.0                        | 119413-54.6             | 763113-22-0                    | 36791-04.5         | 117-39.5                     | Empty |
|   |       | BIBR 1532               | Ellagic acid                      | Foscamet sodium | Ciprofloxacin hydrochloride | Gemcitabine               | Dequalinium chloride            | Topotecan hydrochloride | Ulaparib (AZD2281, KU-0059436) | Ribavirin          | Quercetin                    |       |
| b | Empty | 29767-20-2              | 86639-52.3                        | 587871-26.9     | 61379-65.5                  | 39809-25.1                | 404950-80.7                     | 1345675-02.6            | 912445-05.7                    | 142217-69.4        | 1009820-21.6                 | Empty |
|   |       | Teniposide              | SN-38                             | KU55933         | Rifapentine                 | Penciclovir               | Panobinostat (LBH589)           | ETP46464                | ABT888 hydrochloride           | Entecavir          | CX-4945 (Silmitsertib)       |       |
| c | Empty | 344458-15-7             | 783355-60-2                       | 17374-26.4      | 61281-37-6                  | 52286-74.5                | 1012054-59.9                    | 325970-71.6             | 209783-80-2                    | 97682-44.5         | 344458-19-1                  | Empty |
|   |       | PJ34 hydrochloride      | PCI-24781 (Abexinostat)           | TBB(NSC 231634) | Schizandrin B               | Ginsenoside Rg2           | CUDC-101                        | L67                     | Entinostat (MS-275)            | Innotecan          | PJ34                         |       |
| d | Empty | 329907-28.0             | 209216-23.9                       | 1232416-25.9    | 244767-67.7                 | 925701-49.1               | 1316214-52.4                    | 912444-00.9             | 154447-35-5                    | 301836-43.1        | 95734-82.0                   | Empty |
|   |       | TTP 22                  | Entecavir hydrate                 | VE822           | Dapivirine (TMC120)         | KU-60019                  | Rocilinostat (ACY-1215)         | Veliparib (ABT-888)     | NU7026                         | D 4476             | Nedaplatin                   |       |
| e | Empty | 726169-73.9             | 186692-46.6                       | 1232410-49.9    | 252935-94.7                 | 1095382-05.0              | 252917-06.9                     | 112522-64.2             | 1223001-51.1                   | 1403764-72.6       | 1609960-30.6                 | Empty |
|   |       | Mocetinostat (MGCD0103) | Roscovoline (CYC202, Seli ciclib) | VE-821          | CHIR-98014                  | CCT137690                 | CHIR-99021                      | CI994 (Tacedinaline)    | Torin 2                        | PFI-1 (PF-6405761) | TH287 hydrochloride          |       |
| f | Empty | 410536-97.9             | 519-23.3                          | 537672-41.6     | 601514-19.6                 | 937039-45.7               | 84605-18.5                      | 75607-67.9              | 61276-17.3                     | 1352226-88.0       | 1219168-18.9                 | Empty |
|   |       | Sirtinol                | Ellipticine                       | UF010           | TWS119                      | Pimelic diphenylamide 116 | Cycloastragenol                 | Fludarabine Phosphate   | Verbascoside                   | Az65738            | Dorsomorphin dihydrochloride |       |
| g | Empty | 313516-66.4             | 503468-95.9                       | 3544-24.9       | 1198097-97.0                | 31083-55.3                | 1190307-88.0                    | 4707-32.8               | 1169562-71.3                   | 125314-13.8        | 1604810-83.4                 | Empty |
|   |       | T0070907                | NU7441 (KU-57788)                 | INO-1001        | Mirin                       | PRT 4165                  | Sotlosbuvir (PSI-7977, GS-7927) | Beta-Lapachone          | XL413-hydrochloride            | CP21R7             | THZ1                         |       |
| h | Empty | 161058-83.9             | 327036-89.5                       | 869363-13.3     | 1054543-47.3                | 891494-64.7               | 1228013-15.7                    | 168425-64.7             | 1796596-46.7                   | 924473-59.6        | 1169558-38.6                 | Empty |
|   |       | NU2058                  | TDZD-8                            | MLN8054         | Apoptozole                  | SCH900776 S-isomer        | CC-115                          | Compound 401            | NSC23005 Sodium                | T5601640           | XL413                        |       |

B

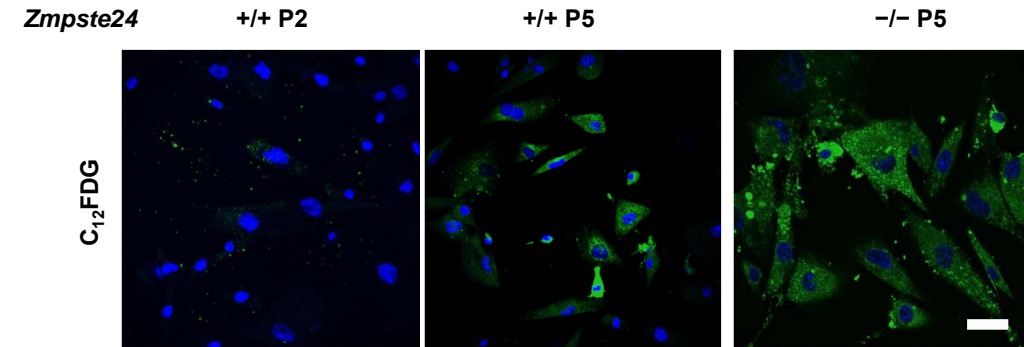

C

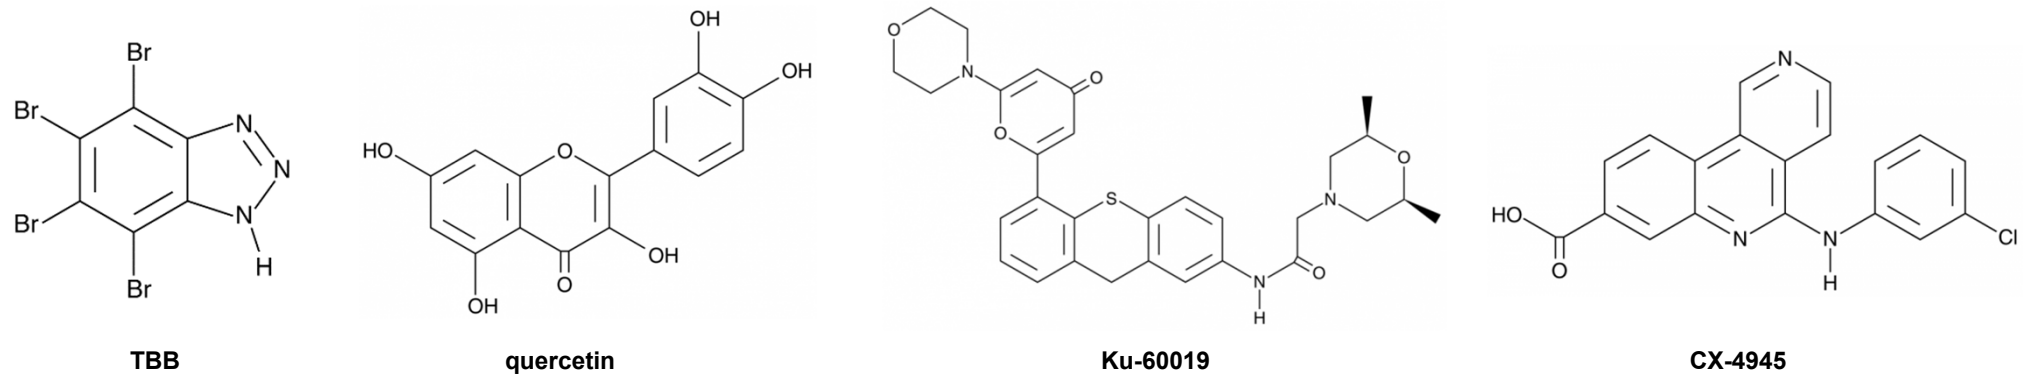

### Supplementary Figure 1. Classes of compound libraries for DDR-related kinase inhibitors

(A) Detail of the compound library of DDR-related kinase inhibitors. (B) Representative immunofluorescence confocal microscopy images from triplicate experiments of C<sub>12</sub>FDG stained senescent cells. Scale bar, 10 μm. (C) Structure of 4,5,6,7-tetrabromo-2-azabenzimidazole (TBB), quercetin, Ku-60019 and CX-4945.

**A**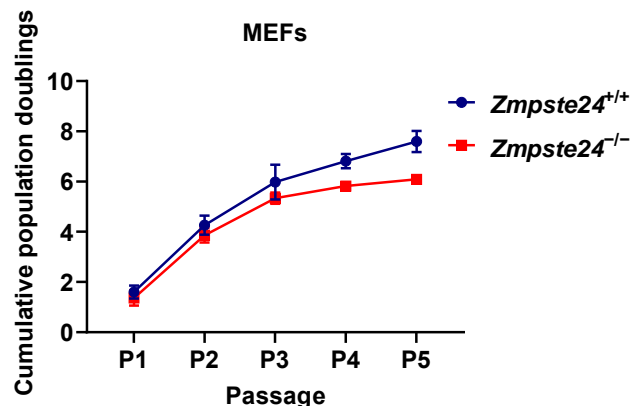**B**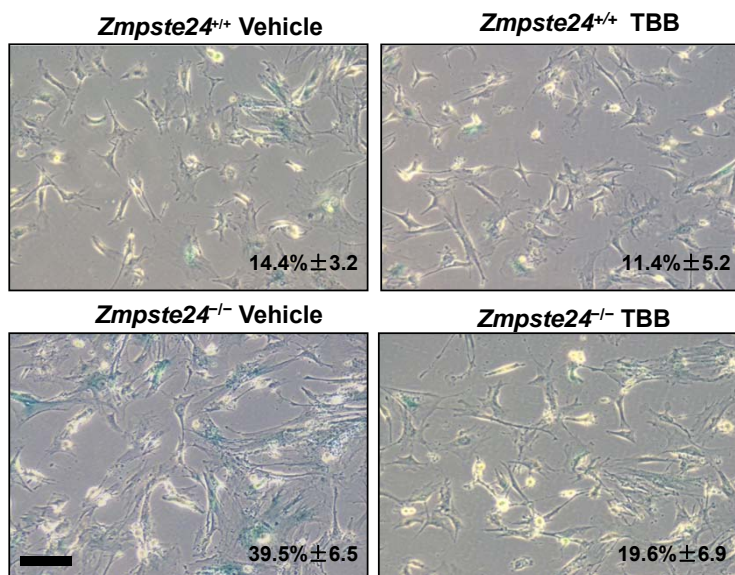**C**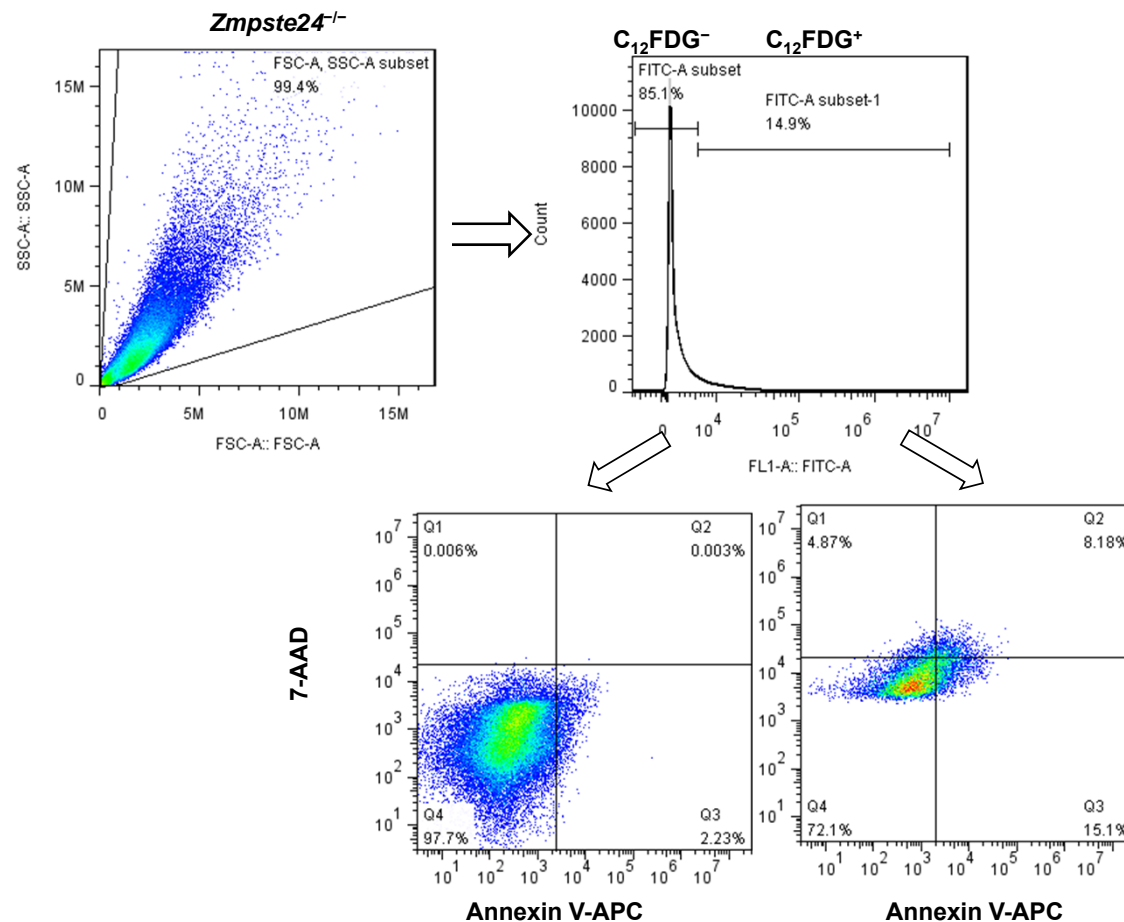

### Supplementary Figure 2. TBB does not affect the apoptosis of nonsenescent cells

(A) Continuous passaging assay in MEFs showing *Zmpste24*<sup>+/+</sup> and *Zmpste24*<sup>-/-</sup> MEFs. (B) Representative images of SA-β-Gal activity showing blue-stained senescent cells in *Zmpste24*<sup>-/-</sup> MEFs and WT littermate controls treated with 75 μM TBB or DMSO (control) at passage 6. Scale bar, 100 μm. (C) Gating Strategy for *C*<sub>12</sub>FDG-AnnexinV-7AAD Flow Cytometry. A two-parameter display of FSC versus SSC was set up to exclude subcellular debris. In a green fluorescence histogram *C*<sub>12</sub>FDG fluorescence intensity was depicted in log scale. The percentage of positive cells was estimated by dividing the number of events within the bright fluorescence compartment by the total number of cells in the histogram. To estimate the number of live cells in SA-β-Gal positive and negative cells the subpopulation analyzed (*C*<sub>12</sub>FDG positive cells or *C*<sub>12</sub>FDG negative cells) was depicted on a two-parameter display of APC vs. PE-Cy5. The cells that were considered alive were those negative for APC (Annexin V-APC) and PE-Cy5 (7-AAD), AnnexinV-APC positive cells were considered apoptotic.

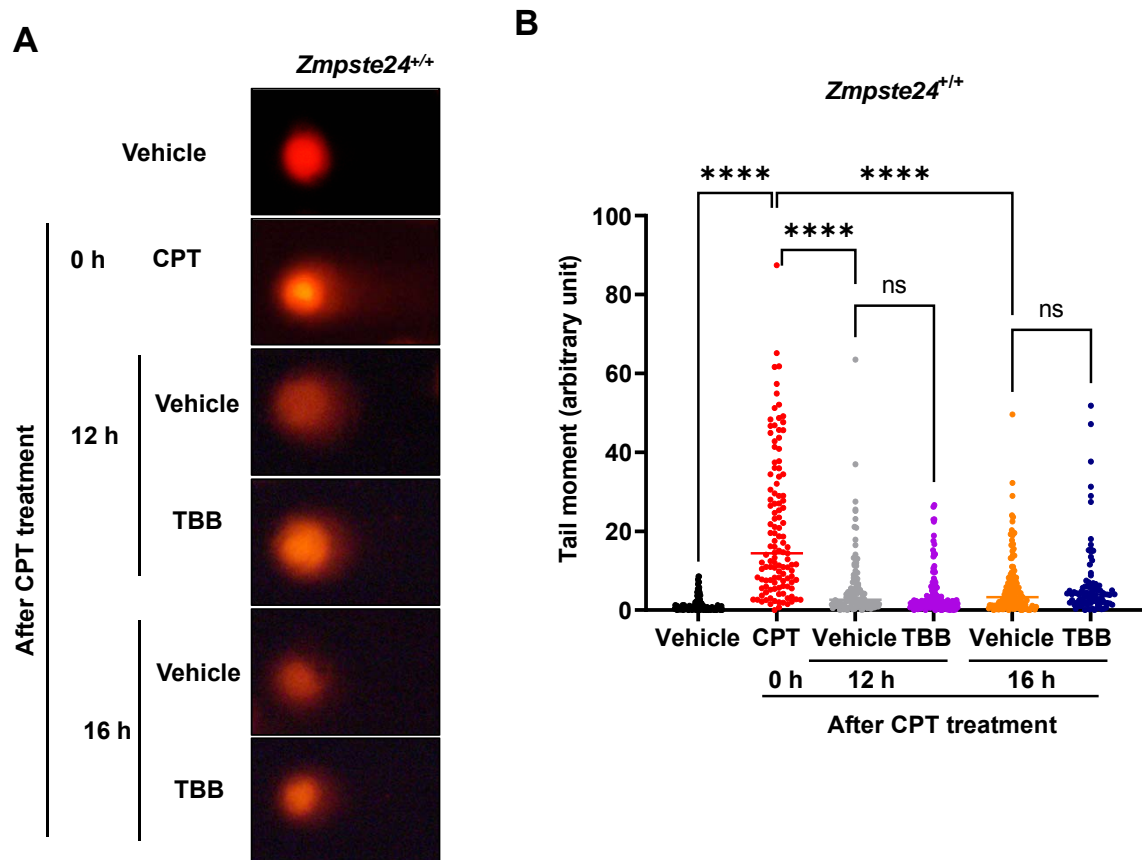

**Supplementary Figure 3. TBB does not affect tail moment after CPT treatment in wild-type cells**  
 Representative comet assay images at indicated time points after 4  $\mu$ M camptothecin (CPT) for 1 h induced DNA damage or vehicle DMSO control in *Zmpste24<sup>+/+</sup>* MEFs pretreated with 75  $\mu$ M TBB for 6 hours. (B) Tail moments quantified by Open Comet software after treatment with vehicle or TBB, as in A .

**A**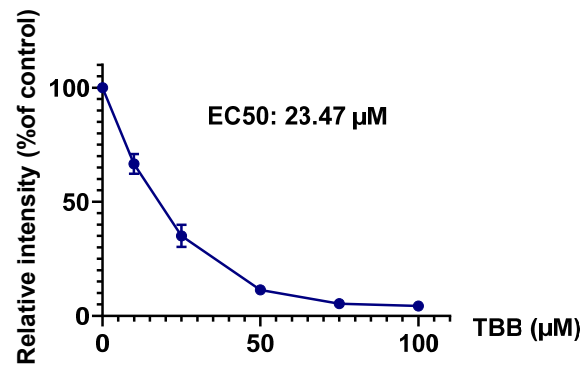**B**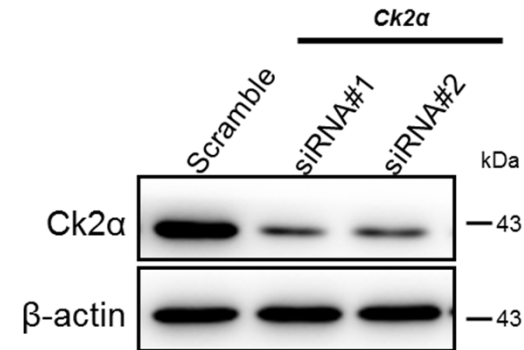**Supplementary Figure 4. TBB specifically inhibits the activity of CK2 *in vitro***

(A) Relative CK2 enzyme activity detection under 0–100  $\mu$ M TBB treatment *in vitro*. Chart plots mean  $\pm$  SD from independent triplicate experiments. (B) Representative immunoblots showing Ck2 $\alpha$  and  $\beta$ -actin protein levels in wild-type MEF cells at passage 6 treated with si-CK2 $\alpha$  or scramble siRNA.

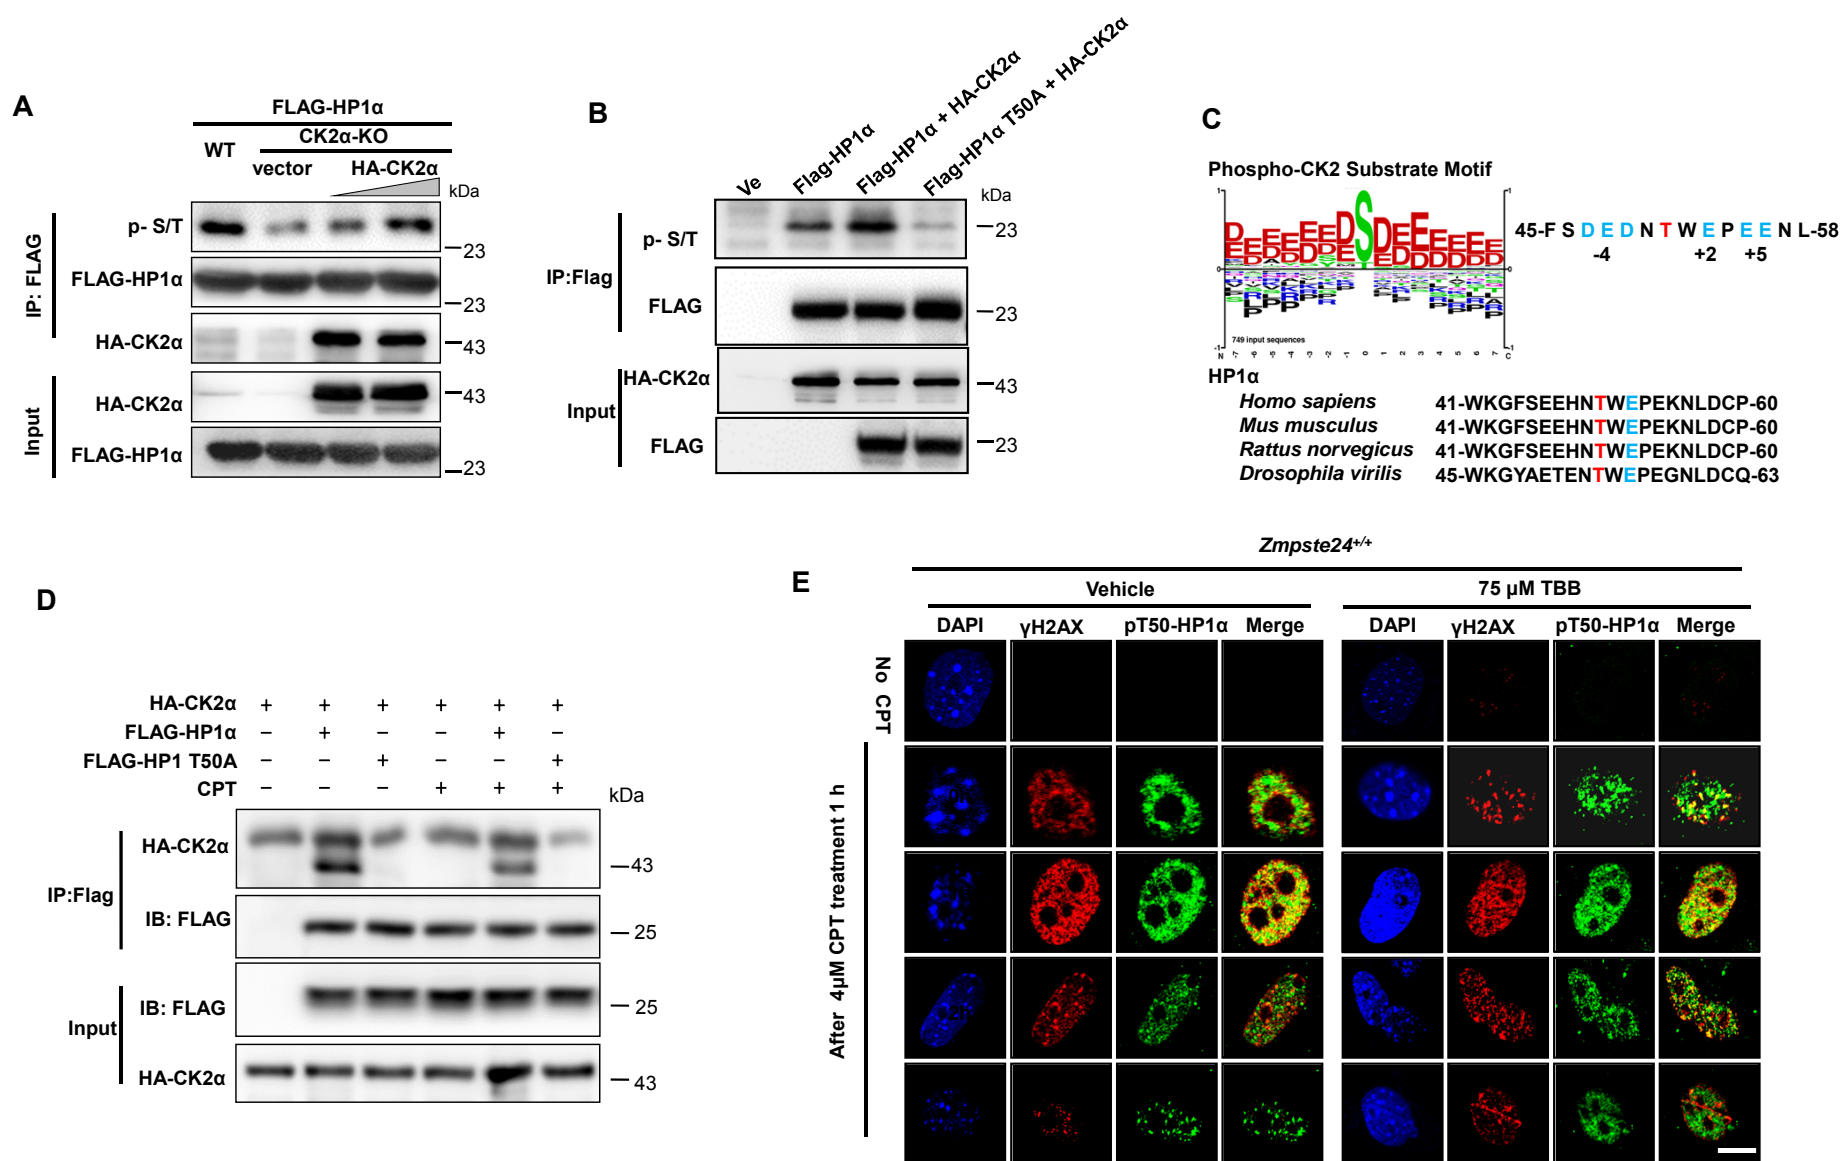

### Supplementary Figure 5. CK2 phosphorylates HP1 $\alpha$ at position T50

(A) Immunoblots showing p-S/T Q of FLAG-HP1 $\alpha$  transfected HA-CK2 $\alpha$  and FLAG-HP1 $\alpha$  by using an anti-FLAG antibody in CK2 $\alpha$  knockout HKE293 cells. The amount of CK2 $\alpha$  plasmid was 0.1, 0.5, and 1  $\mu$ g. (B) Immunoblots showing p-S/T Q of FLAG-HP1 $\alpha$  or T50A transfected with HA-CK2 $\alpha$  and FLAG-HP1 $\alpha$  by using an anti-FLAG antibody in HKE293 cells. (C) Alignment of phosphorylation motifs of CK2 and HP1 $\alpha$  at position T50 in different species. (D) Immunoblots showing pT50-HP1 $\alpha$  and CK2 $\alpha$  protein levels after treatment with 75  $\mu$ M TBB or vehicle in CK2 $\alpha$  knockout HKE293 cells and control cells. (E) Representative immunofluorescence confocal microscopy images of  $\gamma$ -H2AX and pT50-HP1 $\alpha$  immunofoci recruitment in response to 4  $\mu$ M CPT-induced DNA damage in TBB treated *Zmpste24*<sup>+/+</sup> MEFs. TBB inhibited the co-immunofoci of pT50-HP1 $\alpha$  and  $\gamma$ -H2AX at the indicated time (after CPT treatment 0, 1, 2, 4 hours). Scale bar, 10  $\mu$ m.



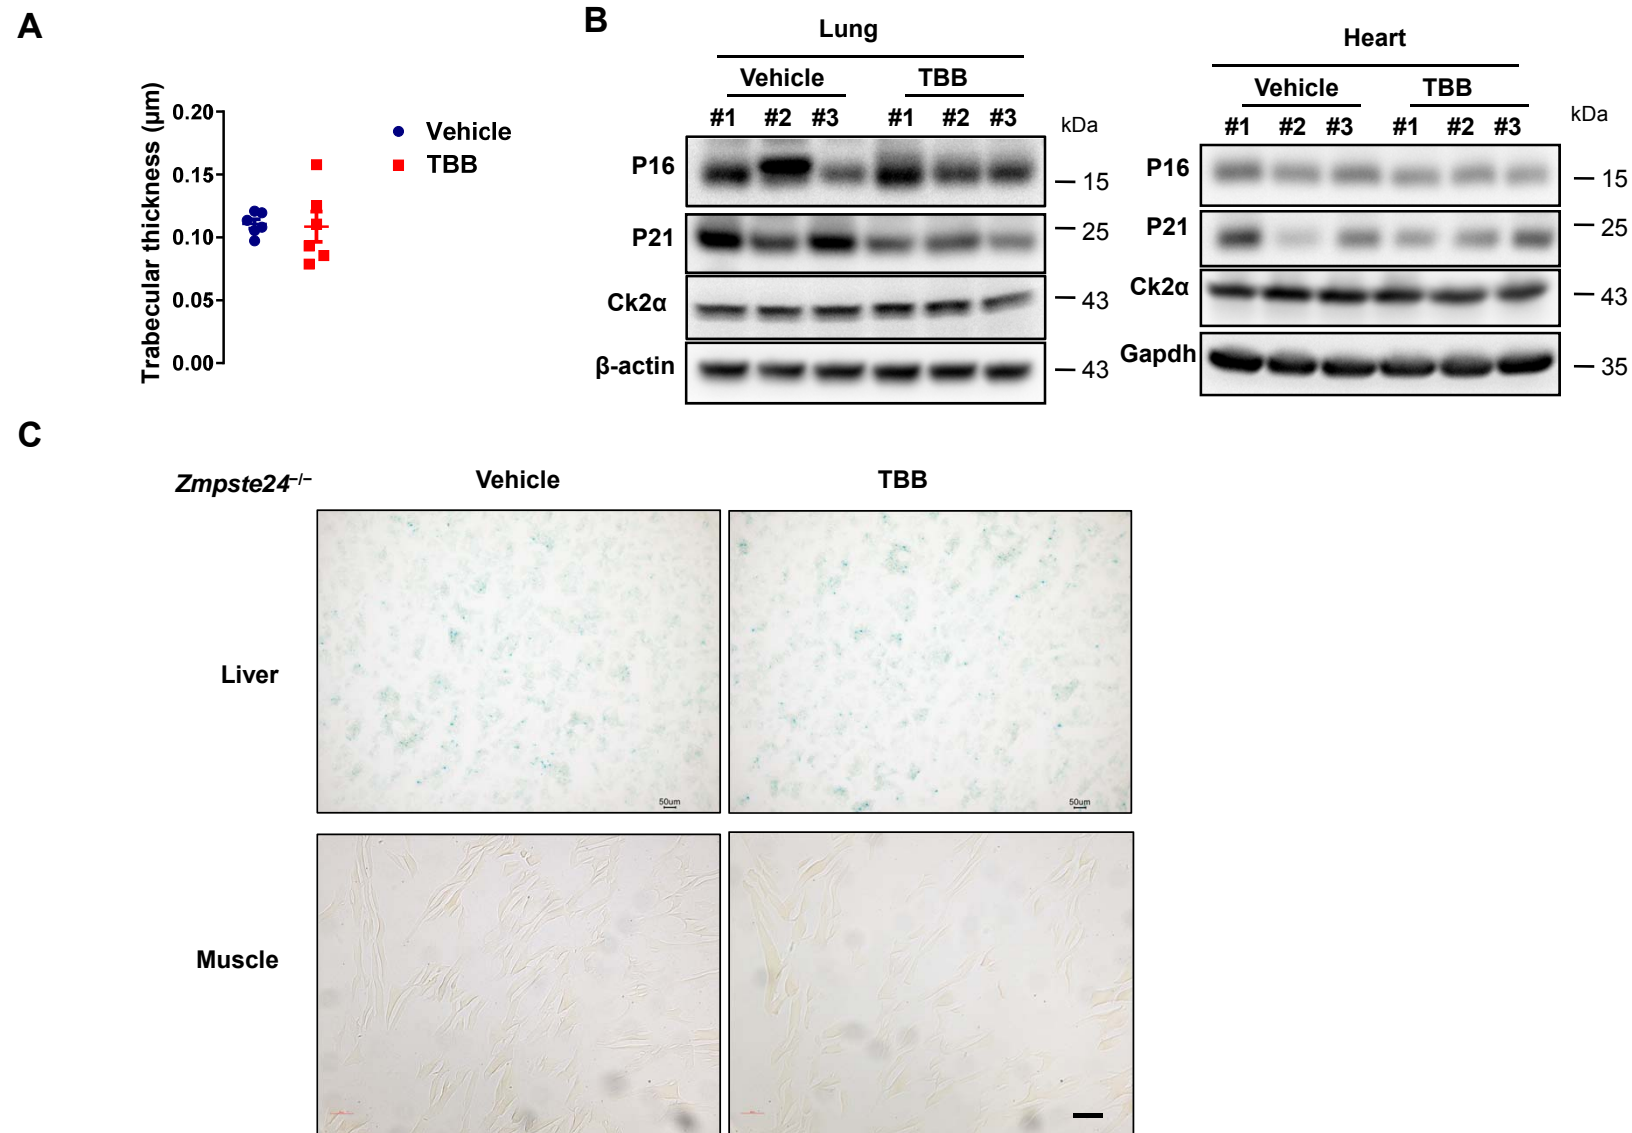

**Supplementary Figure 6. TBB does not affect the thickness of trabecular bone in *Zmpste24*-deficient mice**  
 (A) Micro-CT analysis showed no significant change in trabecular bone thickness in TBB-fed *Zmpste24*<sup>-/-</sup> mice. (B) Immunoblots showing P16 and P21 protein levels in lung and heart tissues isolated from male TBB-fed *Zmpste24*<sup>-/-</sup> and vehicle-fed control mice. (C) Representative photos of SA- $\beta$ -gal activity showing blue-stained senescent cells of liver and muscle in TBB-fed *Zmpste24*<sup>-/-</sup> mice compared against those of vehicle-fed controls. Scale bar, 50  $\mu\text{m}$ .

A

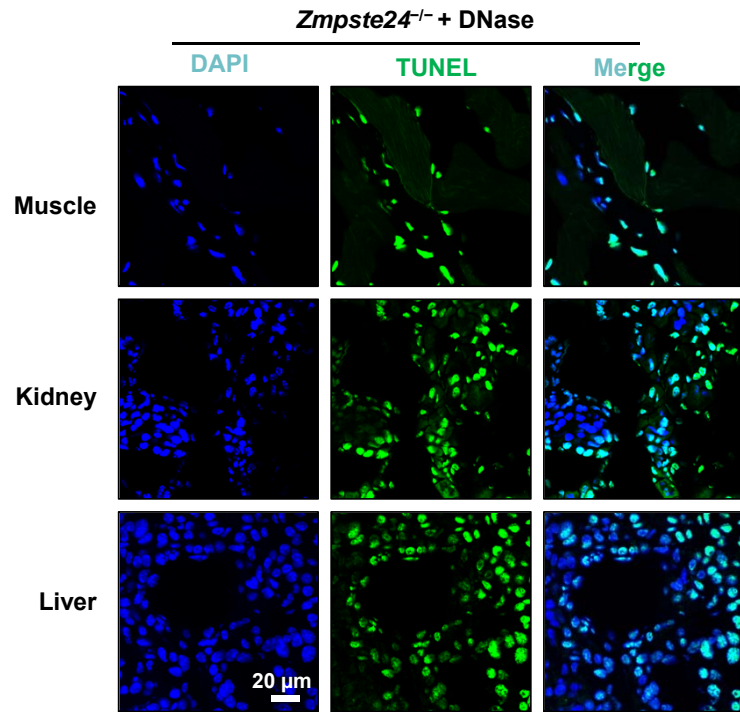

B

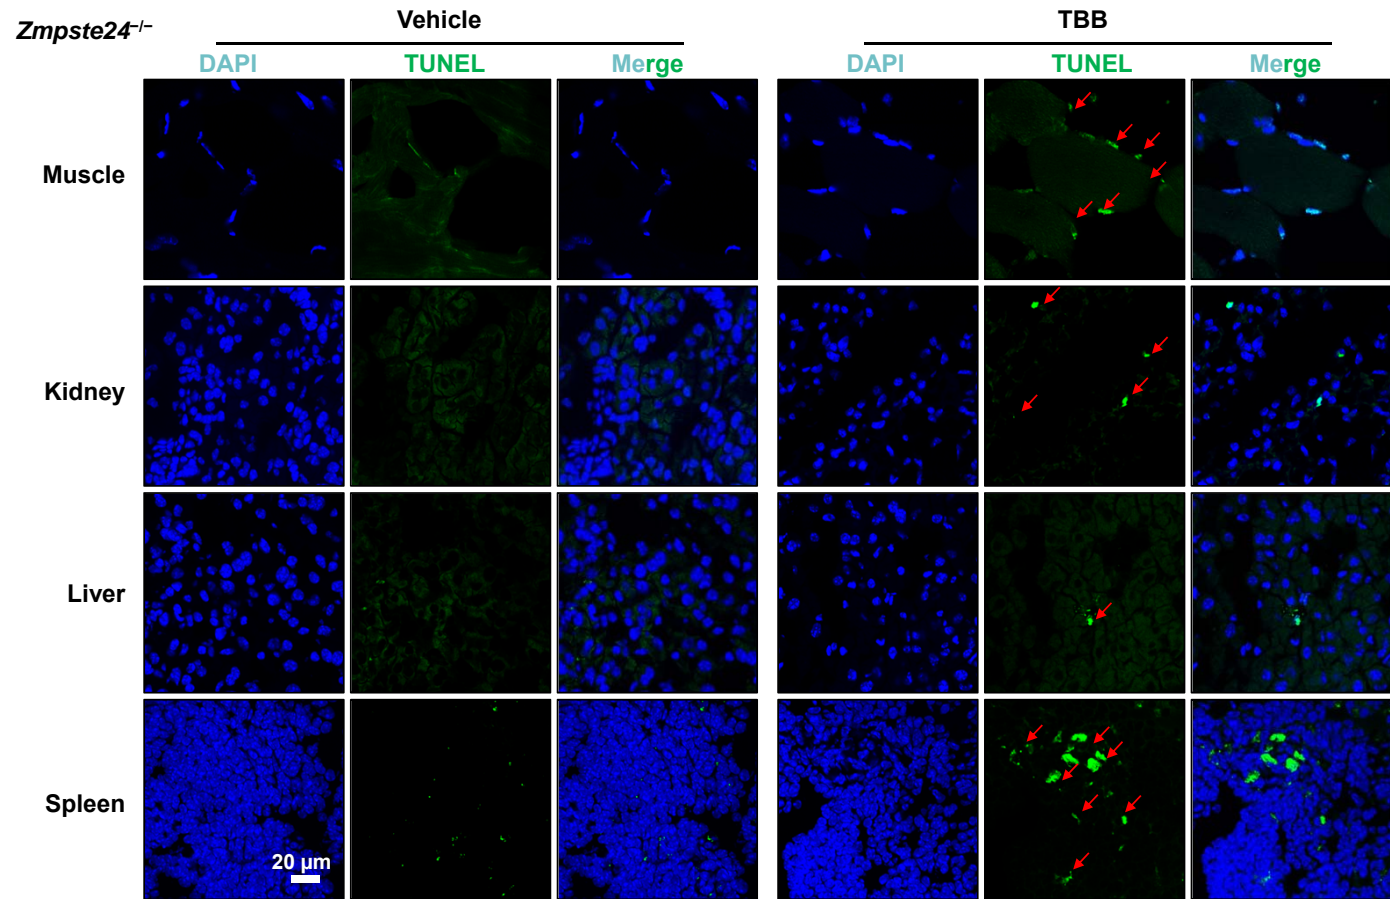

**Supplementary Figure 7.** (A) Frozen sections were stained for apoptosis in *Zmpste24*<sup>-/-</sup> mice, and DNase treatment was used as a positive control. (B) Frozen sections were used for tissue apoptosis staining in TBB-fed *Zmpste24*<sup>-/-</sup> mice were compared with vehicle controls, the red scissors indicated apoptotic signals. Scale bar, 20  $\mu$ m.

**Table S1. Compound List**

| <b>Index</b> | <b>ID</b> | <b>MOLENAME</b>                | <b>CAS</b>   | <b>Formula</b>  | <b>MolWt</b> |
|--------------|-----------|--------------------------------|--------------|-----------------|--------------|
| 1            | T2380     | BIBR 1532                      | 321674-73-1  | C21H17NO3       | 331.36       |
| 2            | T0465     | Ellagic acid                   | 476-66-4     | C14H6O8         | 302.19       |
| 3            | T0220     | Foscarnet sodium               | 63585-09-1   | CNa3O5P         | 191.95       |
| 4            | T0250     | Ciprofloxacin hydrochloride    | 93107-08-5   | C17H18FN3O3·HCl | 367.8        |
| 5            | T0251     | Gemcitabine                    | 95058-81-4   | C9H11F2N3O4     | 263.2        |
| 6            | T0979     | Dequalinium chloride           | 522-51-0     | C30H40Cl2N4     | 527.59       |
| 7            | T1174     | Topotecan hydrochloride        | 119413-54-6  | C23H24ClN3O5    | 457.92       |
| 8            | T3015     | Olaparib (AZD2281, Ku-0059436) | 763113-22-0  | C24H23FN4O3     | 434.46       |
| 9            | T0684     | Ribavirin                      | 36791-04-5   | C8H12N4O5       | 244.2        |
| 10           | T2174     | Quercetin                      | 117-39-5     | C15H10O7        | 302.24       |
| 11           | T1523     | Teniposide                     | 29767-20-2   | C32H32O13S      | 656.66       |
| 12           | T1703     | SN-38                          | 86639-52-3   | C22H20N2O5      | 392.4        |
| 13           | T2685     | KU55933                        | 587871-26-9  | C21H17NO3S2     | 395.49       |
| 14           | T1629     | Rifapentine                    | 61379-65-5   | C47H64N4O12     | 877.03       |
| 15           | T1643     | Penciclovir                    | 39809-25-1   | C10H15N5O3      | 253.26       |
| 16           | T2383     | Panobinostat (LBH589)          | 404950-80-7  | C21H23N3O2      | 349.43       |
| 17           | T2084     | ETP46464                       | 1345675-02-6 | C30H22N4O2      | 470.52       |
| 18           | T2105     | ABT888 hydrochloride           | 912445-05-7  | C13H18Cl2N4O    | 317.21       |
| 19           | T0085L    | Entecavir                      | 142217-69-4  | C12H15N5O3      | 277.28       |
| 20           | T2259     | CX-4945 (Silmitasertib)        | 1009820-21-6 | C19H12ClN3O2    | 349.77       |
| 21           | T2124     | PJ34 hydrochloride             | 344458-15-7  | C17H18ClN3O2    | 311.8        |
| 22           | T0431     | PCI-24781 (Abexinostat)        | 783355-60-2  | C21H23N3O5      | 397.42       |
| 23           | T2695     | TBB(NSC 231634)                | 17374-26-4   | C6HBr4N3        | 434.71       |
| 24           | T2925     | Schizandrin B                  | 61281-37-6   | C23H28O6        | 400.46       |
| 25           | T2873     | Ginsenoside Rg2                | 52286-74-5   | C42H72O13       | 785.01       |
| 26           | T3108     | CUDC-101                       | 1012054-59-9 | C24H26N4O4      | 434.49       |
| 27           | T3103     | L67                            | 325970-71-6  | C16H14Br2N4O4   | 486.11       |
| 28           | T6233     | Entinostat (MS-275)            | 209783-80-2  | C21H20N4O3      | 376.41       |
| 29           | T6228     | Irinotecan                     | 97682-44-5   | C33H38N4O6      | 586.68       |
| 30           | T6197     | PJ34                           | 344458-19-1  | C17H17N3O2      | 295.34       |
| 31           | T1828     | TTP 22                         | 329907-28-0  | C16H14N2O2S2    | 330.42       |
| 32           | T0085     | Entecavir hydrate              | 209216-23-9  | C12H15N5O3·H2O  | 295.3        |
| 33           | T2669     | VE822                          | 1232416-25-9 | C24H25N5O3S     | 463.55       |
| 34           | T1815     | Dapivirine (TMC120)            | 244767-67-7  | C20H19N5        | 329.4        |
| 35           | T2474     | KU-60019                       | 925701-49-1  | C30H33N3O5S     | 547.67       |
| 36           | T2489     | Rocilinostat (ACY-1215)        | 1316214-52-4 | C24H27N5O3      | 433.5        |
| 37           | T2591     | Veliparib (ABT-888)            | 912444-00-9  | C13H16N4O       | 244.29       |
| 38           | T2433     | NU7026                         | 154447-35-5  | C17H15NO3       | 281.31       |
| 39           | T2449     | D 4476                         | 301836-43-1  | C23H18N4O3      | 398.41       |



|    |       |                                 |              |                 |         |
|----|-------|---------------------------------|--------------|-----------------|---------|
| 40 | T2410 | Nedaplatin                      | 95734-82-0   | C2H8N2O3Pt      | 303.18  |
| 41 | T2512 | Mocetinostat (MGCD0103)         | 726169-73-9  | C23H20N6O       | 396.44  |
| 42 | T2095 | Roscovitine (CYC202,Selaciclib) | 186692-46-6  | C19H26N6O       | 354.45  |
| 43 | T3032 | VE-821                          | 1232410-49-9 | C18H16N4O3S     | 368.41  |
| 44 | T2608 | CHIR-98014                      | 252935-94-7  | C20H17Cl2N9O2   | 486.31  |
| 45 | T2611 | CCT137690                       | 1095382-05-0 | C26H31BrN8O     | 551.48  |
| 46 | T2310 | CHIR-99021                      | 252917-06-9  | C22H18Cl2N8     | 465.34  |
| 47 | T1888 | CI994 (Tacedinaline)            | 112522-64-2  | C15H15N3O2      | 269.3   |
| 48 | T6100 | Torin 2                         | 1223001-51-1 | C24H15F3N4O     | 432.4   |
| 49 | T6222 | PFI-1 (PF-6405761)              | 1403764-72-6 | C16H17N3O4S     | 347.39  |
| 50 | T2069 | TH287 hydrochloride             | 1609960-30-6 | C11H10Cl2N4·HCl | 305.59  |
| 51 | T6671 | Sirtinol                        | 410536-97-9  | C26H22N2O2      | 394.47  |
| 52 | T1166 | Ellipticine                     | 519-23-3     | C17H14N2        | 246.31  |
| 53 | T3205 | UF010                           | 537672-41-6  | C11H15BrN2O     | 271.15  |
| 54 | T2166 | TWS119                          | 601514-19-6  | C18H14N4O2      | 318.33  |
| 55 | T3193 | Pimelic diphenylamide 106       | 937039-45-7  | C20H25N3O2      | 339.43  |
| 56 | T3333 | Cycloastragenol                 | 84605-18-5   | C30H50O5        | 490.715 |
| 57 | T6501 | Fludarabine Phosphate           | 75607-67-9   | C10H13FN5O7P    | 365.21  |
| 58 | T3375 | Verbascoide                     | 61276-17-3   | C29H36O15       | 624.59  |
| 59 | T3338 | Azd6738                         | 1352226-88-0 | C20H24N6O2S     | 412.51  |
| 60 | T6146 | Dorsomorphin dihydrochloride    | 1219168-18-9 | C24H25N5O·2HCl  | 472.41  |
| 61 | T6689 | T0070907                        | 313516-66-4  | C12H8ClN3O3     | 277.66  |
| 62 | T6276 | NU7441 (KU-57788)               | 503468-95-9  | C25H19NO3S      | 413.49  |
| 63 | T6329 | INO-1001                        | 3544-24-9    | C7H8N2O         | 136.15  |
| 64 | T3134 | Mirin                           | 1198097-97-0 | C10H8N2O2S      | 220.25  |
| 65 | T3110 | PRT 4165                        | 31083-55-3   | C15H9NO2        | 235.24  |
| 66 | T6676 | Sofosbuvir (PSI-7977, GS-7977)  | 1190307-88-0 | C22H29FN3O9P    | 529.45  |
| 67 | T6407 | Beta-Lapachone                  | 4707-32-8    | C15H14O3        | 242.27  |
| 68 | T6735 | XL413-hydrochloride             | 1169562-71-3 | C14H13Cl2N3O2   | 122.1   |
| 69 | T3684 | CP21R7                          | 125314-13-8  | C19H15N3O2      | 317.3   |
| 70 | T3664 | THZ1                            | 1604810-83-4 | C31H28ClN7O2    | 566.05  |
| 71 | T3186 | NU2058                          | 161058-83-9  | C12H17N5O       | 247.3   |
| 72 | T6187 | TDZD-8                          | 327036-89-5  | C10H10N2O2S     | 222.26  |
| 73 | T6315 | MLN8054                         | 869363-13-3  | C25H15ClF2N4O2  | 476.86  |
| 74 | T3293 | Apoptozole                      | 1054543-47-3 | C33H25F6N3O3    | 625.56  |
| 75 | T3700 | SCH900776 S-isomer              | 891494-64-7  | C15H18BrN7      | 376.25  |
| 76 | T3541 | CC-115                          | 1228013-15-7 | C16H16N8O       | 336.35  |
| 77 | T3586 | Compound 401                    | 168425-64-7  | C16N15H3O2      | 281.31  |
| 78 | T3589 | NSC23005 Sodium                 | 1796596-46-7 | C13H16NNaO4S    | 305.324 |
| 79 | T3960 | T5601640                        | 924473-59-6  | C19H14F3N3O3    | 389.33  |
| 80 | T3352 | XL413                           | 1169558-38-6 | C14H12ClN3O2    | 289.06  |

**Table S2. List of primers used in this study**

| Name                                   | Sequence                                                     |
|----------------------------------------|--------------------------------------------------------------|
| <b>CK2<math>\alpha</math> RNAi</b>     |                                                              |
| si-mCk2 $\alpha$ -1 sense              | 5'-CGAGUUGCUUCUCGAUAUUU-3'                                   |
| si-mCk2 $\alpha$ -1 antisense          | 5'-AAUAUCGAGAAGCAACUCG-3'                                    |
| si-mCk2 $\alpha$ -2 sense              | 5'-UGGACAAGCUGCUUCGAUAU-3'                                   |
| si-mCk2 $\alpha$ -2 antisense          | 5'-AUAUCGAAGCAGCUUGUCCA-3'                                   |
| <b>Protein expression</b>              |                                                              |
| HP1 $\alpha$ -flag-F                   | 5'-GGTACCATGGGAAAGAAAACCAAGC-3'                              |
| HP1 $\alpha$ -flag-R                   | 5'-GCGTCTAGATTAGCTCTTTGCTGTTTC-3'                            |
| HP1 $\alpha$ T50A-flag-F               | 5'-CAGGTTCCCAAGCATTGTGCTCCTCAGAAAAGCC-3'                     |
| HP1 $\alpha$ T50A-flag-R               | 5'-GGCTTTTCTGAGGAGCACAATGCTTGGGAACCTG-3'                     |
| HP1 $\alpha$ T50D-flag-F               | 5'-GTTTTTCTCAGTTCCCAATCATTGTGCTCCTCAGAAAAGCCTTT-3'           |
| HP1 $\alpha$ T50D-flag-R               | 5'-AAAGGCTTTTCTGAGGAGCACAATGATTGGGAACCTGAGAAAAAC-3'          |
| HP1 $\alpha$ S11-14A-flag-F            | 5'-acatactcctcctcatcctctgcagcagcagcgtcagctgtccgcttggttttc-3' |
| HP1 $\alpha$ S11-14A-flag-R            | 5'-gaaaaccaagcggacagctgacgctgctgctgagaggatgaggaggatgt-3'     |
| CK2 $\alpha$ -HA-F                     | 5'-AAGCTTATGTGGGACCCGTGCCAA-3'                               |
| CK2 $\alpha$ -HA-R                     | 5'-TCTAGACTGCTGAGCGCCAGCGGCA-3'                              |
| <b>CK2<math>\alpha</math> Knockout</b> |                                                              |
| sgCK2 $\alpha$ -1-F                    | 5'-CACCGCACACAGACCTCGAGAATAC-3'                              |
| sgCK2 $\alpha$ -1-R                    | 5'-AAACGTATTCTCGAGGTCTGTGTGC-3'                              |
| sgCK2 $\alpha$ -2-F                    | 5'-CACCGCTGGGATTACGAGTCACATG-3'                              |
| sgCK2 $\alpha$ -2-R                    | 5'-AAACCATGTGACTCGTAATCCCAGC-3'                              |
| <b>q PCR</b>                           |                                                              |
| mouse Gapdh-F(exon 2-3)                | 5'-AATGGTGAAGGTCGGTGTG-3'                                    |
| mouse Gapdh-R(exon 2-3)                | 5'-GTGGAGTCATACTGGAACATGTAG-3'                               |
| mouse p16 (Cdkn2a) F                   | 5'-CCCAACGCCCCGAAC-3'                                        |
| mouse p16 (Cdkn2a) R                   | 5'-GCAGAAGAGCTGCTACGTGAA-3'                                  |
| mouse p21 (Cdkn1a) F                   | 5'-GTCCAATCCTGGTGATGTCC-3'                                   |
| mouse p21 (Cdkn1a) R                   | 5'-GTTTTCGGCCCTGAGATGT-3'                                    |
| mouse Ccl2-F                           | 5'-ATTGGGATCATCTTGCTGGT-3'                                   |
| mouse Ccl2-R                           | 5'-CCTGGTGTTACAGTTGCC-3'                                     |
| mouse Ccl7-F                           | 5'-CCTGGGAAGCTGTTATCTTCAAG-3'                                |
| mouse Ccl7-R                           | 5'-CCTCCTCGACCCACTTCTGA-3'                                   |
| mouse Ccl3-F                           | 5'-CTCCCAGCCAGGTGTCATTTT-3'                                  |
| mouse Ccl3-R                           | 5'-CTTGGACCCAGGTCTCTTTGG -3'                                 |
| mouse Cxcl5-F                          | 5'-TGCCCTACGGTGAAGTCATA-3'                                   |
| mouse Cxcl5-R                          | 5'-TGCATTCCGCTTAGCTTTCTTT-3'                                 |
| mouse Il10-F                           | 5'-ATAACTGCACCCACTTCCCA-3'                                   |
| mouse Il10-R                           | 5'-GGGCATCACTTCTACCAGGT-3'                                   |
| mouse Cxcl10-F                         | 5'-GCTGGGATTCACCTCAAGAA-3'                                   |
| mouse Cxcl10-R                         | 5'-CTTGGGGACACCTTTTAGCA-3'                                   |
